# Supplementary material
Source: PubMed Central journal article supplement (PMC3650525)
Supplement: JB.02112-12_zjb999092594so1.pdf [file JB.02112-12_zjb999092594so1.pdf]

**SUPPLEMENTARY TABLE 1** – Primers used in this study

| Primer Name                            | Sequence (5' → 3')                                                                | Description                                                                                                                               |
|----------------------------------------|-----------------------------------------------------------------------------------|-------------------------------------------------------------------------------------------------------------------------------------------|
| <b>Methyl HTM-seq primers</b>          |                                                                                   |                                                                                                                                           |
| ABD013                                 | CCCTACACGACGCTCTTCCGATCTACGTATCACG                                                | Top strand of tIL1 adaptor                                                                                                                |
| ABD013D                                | gatcCGTGATACGTAGATCG                                                              | Bottom strand of tIL1 adaptor for Dam Methyl HTM-seq (lower case nucleotides indicate the 5' overhang generated when annealed to ABD013)  |
| ABD013B                                | ccggCGTGATACGTAGATCG                                                              | Bottom strand of tIL1 adaptor for VchM Methyl HTM-seq (lower case nucleotides indicate the 5' overhang generated when annealed to ABD013) |
| OLJ 131                                | AATGATACGGCGACCACCGAGATCTACACTCTTTCCCTACACGACGCTCTTCCGATCT                        | Forward primer for amplification of Methyl HTM-seq samples                                                                                |
| OLJ 573                                | CAAGCAGAAGACGGCATAACGAGATcacacaGTGACTGGAGTTCAGACGTGTGCTCTTCCGATCTGGGGGGGGGGGGGGGG | Reverse primer for amplification of Dam Methyl-HTM seq samples (unique barcode sequence is shown in lower case)                           |
| BC33G                                  | CAAGCAGAAGACGGCATAACGAGATcgtgatGTGACTGGAGTTCAGACGTGTGCTCTTCCGATCTGGGGGGGGGGGGGGGG | Reverse primer for amplification of VchM Methyl-HTM seq samples (unique barcode sequence is shown in lower case)                          |
| <b>MeSR digestion and qPCR primers</b> |                                                                                   |                                                                                                                                           |
| ABD061                                 | TCGCGATTATCCTGATGCTGGTC                                                           | Forward primer for <i>E. coli</i> Dam positive control                                                                                    |
| ABD062                                 | GCTGGCGGGAATGCTGGC                                                                | Reverse primer for <i>E. coli</i> Dam positive control                                                                                    |
| ABD104                                 | GCGTCACCCTTCAAATAGTC                                                              | Forward primer for K139 Ig-I                                                                                                              |
| ABD105                                 | ATTGACAACGTAAATGCCAAACAAC                                                         | Reverse primer for K139 Ig-I                                                                                                              |
| ABD106                                 | TGTTTGGCATTACAGTTGTCAATTG                                                         | Forward primer for K139 Ig-II                                                                                                             |
| ABD107                                 | CCTTAAACGTTGTTAAATCATCGGTTC                                                       | Reverse primer for K139 Ig-II                                                                                                             |
| ABD049                                 | GTGATTCCCTTTTCATTGCATGGAATCC                                                      | Forward primer for P <sub>VC1231</sub>                                                                                                    |
| ABD050                                 | CGTCACATCTCATACACTTGCAATCG                                                        | Reverse primer for P <sub>VC1231</sub>                                                                                                    |
| ABD009                                 | TATATGCCTTTAGGCATTAAGTACTTCCGTC                                                   | Forward primer for P <sub>VC1784</sub>                                                                                                    |
| ABD010                                 | TGAAGTCATCTTGATTGACAAGTCTCCATCGAATG                                               | Reverse primer for P <sub>VC1784</sub>                                                                                                    |
| ABD047                                 | TGGGGTTTCGTGGTGTATATCAAG                                                          | Forward primer for P <sub>VCA0063</sub>                                                                                                   |
| ABD048                                 | GATGTCGTTAACAGCAATACATTGAGC                                                       | Reverse primer for P <sub>VCA0063</sub>                                                                                                   |
| ABD172                                 | GGTCCATGAGTTCACCGTCCAG                                                            | Forward primer for P <sub>VC0286/7</sub>                                                                                                  |
| ABD173                                 | CCAAACTTGC GCGTGATCGC                                                             | Reverse primer for P <sub>VC0286/7</sub>                                                                                                  |

|                                                                                                                                 |                                                                |                                          |
|---------------------------------------------------------------------------------------------------------------------------------|----------------------------------------------------------------|------------------------------------------|
| ABD180                                                                                                                          | GCGCTAACTATCCGAAATGGGATTTTG                                    | Forward primer for P <sub>VC1280/1</sub> |
| ABD181                                                                                                                          | CATACTGGTAGACATAACCAGCACTACAGC                                 | Reverse primer for P <sub>VC1280/1</sub> |
| ABD188                                                                                                                          | GGCAATTCATTTTTAGCCAGTTCAAACG                                   | Forward primer for P <sub>VC1558/9</sub> |
| ABD189                                                                                                                          | GAGTCTAGACACGGATCCCCAC                                         | Reverse primer for P <sub>VC1558/9</sub> |
| <b>SOE PCR primers for generation of mutant strains (overlap for Kan cassette in R1 and F2 primers are shown in lower case)</b> |                                                                |                                          |
| ABD146                                                                                                                          | TTCGGCGGCTGCTAGAGC                                             | F1 primer for $\Delta$ <i>lrp</i>        |
| ABD147                                                                                                                          | gtcgacggatccccggaatCATTTTTTATTCACCTTATTACTTCCTTGC              | R1 primer for $\Delta$ <i>lrp</i>        |
| ABD148                                                                                                                          | gaagcagctccagcctacaTAACTTAAAGCGAATGTTGGAGATCTTTC               | F2 primer for $\Delta$ <i>lrp</i>        |
| ABD149                                                                                                                          | CCGAAGGCGTTTCTTCAAGCTC                                         | R2 primer for $\Delta$ <i>lrp</i>        |
| ABD138                                                                                                                          | ACCACAGCCGTGGTTGCTC                                            | F1 primer for $\Delta$ <i>rpiR</i>       |
| ABD139                                                                                                                          | gtcgacggatccccggaatCACTTGGAGTCCTTAATATTCTTTTGACTAC<br>CATAAAAG | R1 primer for $\Delta$ <i>rpiR</i>       |
| ABD140                                                                                                                          | gaagcagctccagcctacaTAAGCAGTATTTAACAAGTTTGAAACCCATC<br>AGG      | F2 primer for $\Delta$ <i>rpiR</i>       |
| ABD141                                                                                                                          | TTGTTACCACAGACTGTATAGGCAGC                                     | R2 primer for $\Delta$ <i>rpiR</i>       |
| ABD117                                                                                                                          | CAAAGCCTCTGAGCGCCTGTTTGTG                                      | F1 primer for $\Delta$ <i>fur</i>        |
| ABD118                                                                                                                          | gtcgacggatccccggaatCATATACTTTCCTGTTGATGTTCTGCAG                | R1 primer for $\Delta$ <i>fur</i>        |
| ABD119                                                                                                                          | gaagcagctccagcctacaTAACCATAGGCTTTACGCTCTGTAAACC                | F2 primer for $\Delta$ <i>fur</i>        |
| ABD120                                                                                                                          | CTTAAACAAGCGGATGTGATCACTCTG                                    | R2 primer for $\Delta$ <i>fur</i>        |
| ABD175                                                                                                                          | CTGATCGTCGCCCAATGG                                             | F1 primer for $\Delta$ <i>Vc0289</i>     |
| ABD176                                                                                                                          | gtcgacggatccccggaatCATAGGTTATTGAGTCTTTTATAAAATGTTA<br>TGAG     | R1 primer for $\Delta$ <i>Vc0289</i>     |
| ABD177                                                                                                                          | gaagcagctccagcctacaTAACACCAGCACTCCACAAAGGATAAAGC               | F2 primer for $\Delta$ <i>Vc0289</i>     |
| ABD178                                                                                                                          | GCCGAGTACGGCCATAACCG                                           | R2 primer for $\Delta$ <i>Vc0289</i>     |
| ABD183                                                                                                                          | TGGGTGATGGCGCCAATTC                                            | F1 primer for $\Delta$ <i>Vc1286</i>     |
| ABD184                                                                                                                          | gtcgacggatccccggaatCATATTAGAGCCTATAGGAAGTCAGAAACTT<br>C        | R1 primer for $\Delta$ <i>Vc1286</i>     |
| ABD185                                                                                                                          | gaagcagctccagcctacaTAAACGCCCTTAGTGATTTGAAGTTTACAG              | F2 primer for $\Delta$ <i>Vc1286</i>     |
| ABD186                                                                                                                          | GCCGCTCGCATCTATGGTCC                                           | R2 primer for $\Delta$ <i>Vc1286</i>     |
| ABD191                                                                                                                          | GAGATGCAAGCTGGTGATGAGC                                         | F1 primer for $\Delta$ <i>Vc1557</i>     |
| ABD192                                                                                                                          | gtcgacggatccccggaatCAAAAATTAAGCGGCGACCCAAAG                    | R1 primer for $\Delta$ <i>Vc1557</i>     |
| ABD193                                                                                                                          | gaagcagctccagcctacaTGAGTAAACAGCAACGTGTCAGTAA                   | F2 primer for $\Delta$ <i>Vc1557</i>     |
| ABD194                                                                                                                          | GTGGCCAGTGTTGTACAACAGTTG                                       | R2 primer for $\Delta$ <i>Vc1557</i>     |
| FRT-Kan-F                                                                                                                       | ATTCCGGGGATCCGTCGAC                                            | Forward primer for Kan cassette          |
| FRT-Kan-R                                                                                                                       | TGTAGGCTGGAGCTGCTTC                                            | Reverse primer for Kan cassette          |

| Primers for Fur expression construct |                                     |                                                                                            |
|--------------------------------------|-------------------------------------|--------------------------------------------------------------------------------------------|
| ABD084                               | TATAcatatgTCAGACAATAACCAAGCGC       | Forward primer to amplify <i>fur</i> gene containing an engineered NdeI site (lower case)  |
| ABD085                               | ATAggatccTTATTTCTTCGGCTTGTGAGCG     | Reverse primer to amplify <i>fur</i> gene containing an engineered BamHI site (lower case) |
| Primers for EMSA probes              |                                     |                                                                                            |
| ABD116                               | ATAACACAAATGATAATTGATCTTATTTAGATTTG | Forward oligonucleotide for P <sub>VCA0063</sub> (Cy5 end labeled)                         |
| ABD115                               | CAAATCTAAATAAGATCAATTATCATTGTGTTAT  | Reverse oligonucleotide for P <sub>VCA0063</sub>                                           |
| ABD113                               | TTTACTTTACCTCTGGCGAGCG              | Forward primer for P <sub>SodA</sub>                                                       |
| ABD114                               | CTTGGCTATCAGCAAGGCGG                | Reverse primer for P <sub>SodA</sub>                                                       |
| ABD111                               | GAATGCGCAATACTGGTTAAC               | Forward primer for P <sub>AphA</sub>                                                       |
| ABD112                               | CTGATTAGTCGAAAACTGACATTATTC         | Reverse primer for P <sub>AphA</sub>                                                       |
| qRT-PCR primers                      |                                     |                                                                                            |
| ABD033                               | GCTCAATGTATTGCTGTTAACGACATC         | Forward primer for <i>VCA0063</i>                                                          |
| ABD034                               | ATCGGTTTTTCGATTATGCTCAGCC           | Reverse primer for <i>VCA0063</i>                                                          |
| ABD031                               | CGTCCATTGTAGCAAGTAGCGTAA            | Forward primer for <i>VC1784</i>                                                           |
| ABD032                               | TCGGTATCCCAAGTTATACCGCC             | Reverse primer for <i>VC1784</i>                                                           |
| RPB2FD                               | CTGTCTCAAGCCGTTACAA                 | Forward primer for <i>rpoB</i>                                                             |
| RPB2RV                               | TTTCTACCAGTGCAGAGATGC               | Reverse primer for <i>rpoB</i>                                                             |

**SUPPLEMENTARY TABLE 2** – Undermethylated sites in *V. cholerae* identified by Methyl HTM-seq

| Chromosome      | Position <sup>a</sup> | Locus <sup>a</sup> | Frequency <sup>b</sup> | Fold Overrepresented <sup>c</sup> |
|-----------------|-----------------------|--------------------|------------------------|-----------------------------------|
| <b>Dam Data</b> |                       |                    |                        |                                   |
| chrI            | 54096                 | VCr001             | 1.58E-04               | 5.9                               |
| chrI            | 54120                 | VCr001             | 2.32E-04               | 8.8                               |
| chrI            | 90598                 | VC0092             | 1.49E-04               | 5.6                               |
| chrI            | 90603                 | VC0092             | 1.33E-04               | 5.0                               |
| chrI            | 151332                | VCr004             | 1.51E-04               | 5.7                               |
| chrI            | 151356                | VCr004             | 2.36E-04               | 8.9                               |
| chrI            | 205531                | VC0199             | 1.59E-04               | 6.0                               |
| chrI            | 205534                | VC0199             | 1.47E-04               | 5.6                               |
| chrI            | 324420                | VCr007             | 1.48E-04               | 5.6                               |
| chrI            | 324444                | VCr007             | 2.45E-04               | 9.2                               |
| chrI            | 391875                | VC0376             | 1.42E-04               | 5.4                               |
| chrI            | 391878                | VC0376             | 1.26E-04               | 4.7                               |
| chrI            | 402024                | VCr010             | 1.31E-04               | 4.9                               |
| chrI            | 402048                | VCr010             | 2.36E-04               | 8.9                               |
| chrI            | 763048                | VCr013             | 1.69E-04               | 6.4                               |
| chrI            | 763072                | VCr013             | 2.25E-04               | 8.5                               |
| chrI            | 1306007               | ig-VC1231-VC1232   | 6.96E-04               | 26.2                              |
| chrI            | 1306010               | ig-VC1231-VC1232   | 5.74E-04               | 21.6                              |
| chrI            | 1458917               | VC1369             | 1.60E-04               | 6.0                               |
| chrI            | 1458920               | VC1369             | 1.34E-04               | 5.1                               |
| chrI            | 1886030               | VC1751             | 1.36E-04               | 5.1                               |
| chrI            | 1886069               | VC1751             | 1.83E-04               | 6.9                               |
| chrI            | 1933145               | ig-VC1783-VC1784   | 3.28E-04               | 12.4                              |
| chrI            | 1933148               | ig-VC1783-VC1784   | 4.60E-04               | 17.3                              |
| chrI            | 2364224               | ig-K139p05-K139p04 | 2.02E-04               | 7.6                               |
| chrI            | 2364255               | ig-K139p05-K139p04 | 1.22E-04               | 4.6                               |
| chrI            | 2416094               | VC2229             | 1.25E-04               | 4.7                               |
| chrI            | 2416112               | VC2229             | 1.69E-04               | 6.4                               |
| chrI            | 2918860               | VC2712             | 1.79E-04               | 6.7                               |
| chrI            | 2918875               | VC2712             | 1.62E-04               | 6.1                               |
| chrI            | 2993372               | VC2775             | 1.16E-04               | 4.4                               |
| chrI            | 2993388               | VC2775             | 1.54E-04               | 5.8                               |
| chrI            | 2993756               | VC2775             | 1.16E-04               | 4.4                               |
| chrI            | 2993766               | VC2775             | 2.17E-04               | 8.2                               |

|                  |         |                    |          |            |
|------------------|---------|--------------------|----------|------------|
| chrII            | 68810   | ig-VCA0062-VCA0063 | 3.11E-04 | 11.7       |
| chrII            | 68813   | ig-VCA0062-VCA0063 | 1.07E-03 | 40.3       |
| chrII            | 1027744 | VCA1074            | 1.84E-04 | 6.9        |
| chrII            | 1027772 | VCA1074            | 1.57E-04 | 5.9        |
| chrII            | 1051025 | VCA1095            | 1.23E-04 | 4.6        |
| chrII            | 1051058 | VCA1095            | 1.29E-04 | 4.9        |
| <b>VchM Data</b> |         |                    |          | <b>5.9</b> |
| chrI             | 296268  | ig-VC0286-VC0287   | 1.10E-02 | 8.8        |
| chrI             | 296271  | ig-VC0286-VC0287   | 9.66E-03 | 5.6        |
| chrI             | 1356851 | ig-VC1280-VC1281   | 5.55E-03 | 5.0        |
| chrI             | 1356854 | ig-VC1280-VC1281   | 2.72E-03 | 5.7        |
| chrI             | 1670727 | ig-VC1558-VC1559   | 5.27E-03 | 8.9        |
| chrI             | 1670730 | ig-VC1558-VC1559   | 3.80E-03 | 6.0        |

Grayed lines indicate undermethylated intergenic sites

<sup>a</sup> The Position and Locus is based on the annotated N16961 genome containing the K139 prophage genome in chromosome I. The unmethylated site is located in the intergenic region between the loci indicated.

<sup>b</sup> Indicates the frequency of reads mapping to the indicated site relative to the total number of reads mapped

<sup>c</sup> Indicates how overrepresented the reads are at the indicated site relative to the mean number of reads obtained for all sites
